# Supplementary material for: Polygenic Modeling with Bayesian Sparse Linear Mixed Models
Source: PubMed Central journal article supplement (PMC3567190; doi:10.1371/journal.pgen.1003264), 2013-02-07
Supplement: pgen.1003264.s007.pdf [file pgen.1003264.s007.pdf]

**Table S1.** Estimates of PVE, PGE and  $\log_{10}(\pi)$  for CD8, MCH and BMI in the mouse data set. PVE estimates are obtained using LMM, BVSr and BSLMM,  $\log_{10}(\pi)$  estimates are obtained using BVSr and BSLMM, and PGE estimates are obtained using BSLMM. Values in parentheses are standard error (for LMM) or standard deviation of posterior samples (for BVSr and BSLMM).  $n = 1,410, p = 10,768$  for CD8,  $n = 1,580, p = 10,744$  for MCH, and  $n = 1,828, p = 10,771$  for BMI.

|                  | Method | CD8          | MCH          | BMI          |
|------------------|--------|--------------|--------------|--------------|
| PVE              | LMM    | 0.61 (0.03)  | 0.64 (0.03)  | 0.14 (0.03)  |
|                  | BVSr   | 0.66 (0.02)  | 0.57 (0.02)  | 0.13 (0.02)  |
|                  | BSLMM  | 0.64 (0.02)  | 0.61 (0.03)  | 0.13 (0.02)  |
| PGE              | BSLMM  | 0.50 (0.09)  | 0.43 (0.06)  | 0.40 (0.28)  |
| $\log_{10}(\pi)$ | BVSr   | -1.69 (0.12) | -1.62 (0.09) | -1.52 (0.21) |
|                  | BSLMM  | -2.68 (0.24) | -2.77 (0.19) | -2.44 (0.70) |
