# Supplementary material for: Polygenic Modeling with Bayesian Sparse Linear Mixed Models
Source: PubMed Central journal article supplement (PMC3567190; doi:10.1371/journal.pgen.1003264), 2013-02-07
Supplement: pgen.1003264.s009.pdf [file pgen.1003264.s009.pdf]

## Text S2 Detailed MCMC Strategy for BSLMM

To simplify notation, we assume in this section that  $\mathbf{y}$  is centered. We use Markov chain Monte Carlo to obtain posterior samples of  $(h, \rho, \pi, \gamma)$  on the product space  $(0, 1) \times (0, 1) \times (0, 1) \times \{0, 1\}^p$ , which is given by

$$P(h, \rho, \pi, \gamma | \mathbf{y}) \propto P(\mathbf{y} | h, \rho, \pi, \gamma) P(h) P(\rho) P(\gamma | \pi) P(\pi). \quad (53)$$

In the above equation, we explored the fact that the parameters  $\tilde{\beta}$ ,  $\mathbf{u}$  and  $\tau$  can be integrated out analytically to compute the marginal likelihood  $P(\mathbf{y} | h, \rho, \pi, \gamma)$ . The marginal likelihood is

$$P(\mathbf{y} | h, \rho, \pi, \gamma) \propto |\mathbf{H}|^{-\frac{1}{2}} |\sigma_a^{-2} \mathbf{\Omega}|^{\frac{1}{2}} (\mathbf{y}^T \mathbf{P} \mathbf{y})^{-\frac{n}{2}}, \quad (54)$$

where  $\mathbf{H}(\sigma_b^2) = \sigma_b^2 \mathbf{K} + \mathbf{I}_n$ ,  $\mathbf{\Omega}(\sigma_a^2, \sigma_b^2, \gamma) = (\mathbf{X}_\gamma^T \mathbf{H}^{-1} \mathbf{X}_\gamma + \sigma_a^{-2} \mathbf{I}_{|\gamma|})^{-1}$ ,  $\mathbf{P}(\sigma_a^2, \sigma_b^2, \gamma) = \mathbf{H}^{-1} - \mathbf{H}^{-1} \mathbf{X}_\gamma \mathbf{\Omega} \mathbf{X}_\gamma^T \mathbf{H}^{-1}$ . Notice again that  $\sigma_a^2$  is a function of  $h, \rho$  and  $\pi$ , while  $\sigma_b^2$  is a function of  $h$  and  $\rho$ .

To efficiently evaluate the marginal likelihood, we perform an eigen decomposition of the relatedness matrix  $\mathbf{K} = \mathbf{U} \mathbf{D} \mathbf{U}^T$  at the beginning of the MCMC, where  $\mathbf{U}$  is the matrix of eigen vectors and  $\mathbf{D}$  is a diagonal matrix of eigen values. We transform both the phenotype vector and the genotype matrix by multiplying the eigen matrix and calculate  $\mathbf{U}^T \mathbf{y}$  and  $\mathbf{U}^T \mathbf{X}$ . Afterwards, as has been shown previously, the calculations of the determinant and the inverse of matrix  $\mathbf{H}$ , as well as the vector-matrix-vector form  $\mathbf{y}^T \mathbf{P} \mathbf{y}$ , in each iteration of the MCMC, are easy to perform [1, 2].

We use a standard Metropolis-Hastings algorithm to draw posterior samples of the hyper-parameters  $(h, \rho, \pi, \gamma)$  based on the above marginal likelihood. Following [3], we use a rank based proposal distribution for  $\gamma$ , and use random walk proposals based on uniform distributions for  $h, \rho$  and  $\log(\pi)$ . In particular, we first obtain single-SNP  $p$  values using a standard LMM with GEMMA algorithm [2], and then rank SNPs based on these  $p$  values from small to large. Our aim is to use a proposal distribution for  $\gamma$  that puts more weights on SNPs that are ranked higher by the single SNP tests, and to do this we consider a mixture distribution  $Q_p = 0.3U_p + 0.7G_p$ , where  $U_p$  is a uniform distribution on  $1, \dots, p$  and  $G_p$  is a geometric distribution truncated to  $1, \dots, p$  with its parameter chosen to give a mean of 2000. We denote  $\gamma^+ = \{i : \gamma_i = 1\}$  and we propose the new  $\gamma$  by randomly choose one of the following steps:

- add a covariate with probability 0.4: generate  $r$  from  $Q_p$  until the covariate with rank  $r$  is not in  $\gamma^+$ , then add this covariate to  $\gamma^+$
- remove a covariate with probability 0.4: pick a covariate in  $\gamma^+$  uniformly at random and remove it from  $\gamma^+$
- switch a pair of covariates with probability 0.2: pick up two covariates by the above two steps, and switch their indicator values

For the other hyper-parameters, we update  $\log(\pi)$  by adding a random variable from  $U(-0.05, 0.05)$  to the current value, and update  $h$  and  $\rho$  by adding a random variable from  $U(-0.1, 0.1)$  to the current values. New values of  $h$  and  $\rho$  that lie outside the boundary  $[0, 1]$  are reflected back.

In addition to the above local proposal distributions, we also use a ‘‘small world proposal’’ which improves theoretical MCMC convergence [4]. In brief, with probability 0.33 in each iteration, we make a longer-range proposal by compounding many local moves, where the number of compounded local moves is draw uniformly from 1 to 20.

For each sampled values of  $(h, \rho, \pi, \gamma)$ , we further obtain samples of  $\tau$  and  $\tilde{\beta}$  using the conditional distributions  $P(\tau | \mathbf{y}, h, \rho, \pi, \gamma)$  and  $P(\tilde{\beta} | \mathbf{y}, h, \rho, \pi, \gamma, \tau)$  listed below:

$$\tau | \mathbf{y}, h, \rho, \pi, \gamma \sim \text{Gamma}\left(\frac{n}{2}, \frac{\mathbf{y}^T \mathbf{P} \mathbf{y}}{2}\right), \quad (55)$$

$$\tilde{\beta}_\gamma | \mathbf{y}, h, \rho, \pi, \gamma, \tau \sim \text{MVN}_{|\gamma|}(\mathbf{\Omega} \mathbf{X}_\gamma^T \mathbf{H}^{-1} \mathbf{y}, \tau^{-1} \mathbf{\Omega}), \quad (56)$$

$$\tilde{\beta}_{-\gamma} | \mathbf{y}, h, \rho, \pi, \gamma, \tau \sim \delta_0. \quad (57)$$

Afterwards, we sample  $\mathbf{u}$  based the conditional distribution  $P(\mathbf{u}|\mathbf{y}, h, \rho, \pi, \gamma, \tau, \tilde{\boldsymbol{\beta}})$ :

$$\mathbf{u}|\mathbf{y}, h, \rho, \pi, \gamma, \tau, \tilde{\boldsymbol{\beta}} \sim \text{MVN}_n(\sigma_b^2 \mathbf{K} \mathbf{H}^{-1} (\mathbf{y} - \mathbf{X}_\gamma \tilde{\boldsymbol{\beta}}_\gamma), \sigma_b^2 \mathbf{K} \mathbf{H}^{-1} \tau^{-1}). \quad (58)$$

However, we do not sample  $\mathbf{u}$  directly from the above  $n$ -dimensional multivariate normal distribution. Instead, we sample  $\mathbf{U}^T \mathbf{u}$  (and we never need to obtain  $\mathbf{u}$ ), as the conditional distribution of each element in  $\mathbf{U}^T \mathbf{u}$  is a normal:

$$\mathbf{U}^T \mathbf{u}|\mathbf{y}, h, \rho, \pi, \gamma, \tau, \tilde{\boldsymbol{\beta}} \sim \text{MVN}_n(\sigma_b^2 \mathbf{D} (\sigma_b^2 \mathbf{D} + \mathbf{I})^{-1} (\mathbf{U}^T \mathbf{y} - \mathbf{U}^T \mathbf{X}_\gamma \tilde{\boldsymbol{\beta}}_\gamma), \sigma_b^2 \mathbf{D} (\sigma_b^2 \mathbf{D} + \mathbf{I})^{-1} \tau^{-1}). \quad (59)$$

where the covariance matrix is diagonal.

For each sampled value of  $(\tilde{\boldsymbol{\beta}}, \mathbf{u}, \tau)$ , we obtain samples of PVE and PGE based on equations (13) and (14).

When required (e.g. for evaluating RPG in simulation studies), in the special case  $\mathbf{K} = \mathbf{X} \mathbf{X}^T / p$ , we also obtain the (approximate) posterior mean of  $\boldsymbol{\alpha}$  in the alternative model formulation (46)-(49). This is achieved without sampling  $\boldsymbol{\alpha}$  in each iteration using the fact that the full conditional distribution of  $\boldsymbol{\alpha}$  given other sampled values is

$$\boldsymbol{\alpha}|\mathbf{y}, h, \rho, \pi, \gamma, \tau, \tilde{\boldsymbol{\beta}} \sim \text{MVN}_n(\sigma_b^2 p^{-1} \mathbf{X}^T \mathbf{H}^{-1} (\mathbf{y} - \mathbf{X}_\gamma \tilde{\boldsymbol{\beta}}_\gamma), \sigma_b^2 (p^{-1} \mathbf{I}_p - p^{-2} \sigma_b^2 \mathbf{X}^T \mathbf{H}^{-1} \mathbf{X}) \tau^{-1}), \quad (60)$$

which leads to the Rao-Blackwellised approximation for the posterior mean of  $\boldsymbol{\alpha}$ :

$$\hat{\boldsymbol{\alpha}} = \frac{1}{T} \sum_{t=1}^T \text{E}(\boldsymbol{\alpha}|\mathbf{y}, h^{(t)}, \rho^{(t)}, \pi^{(t)}, \gamma^{(t)}, \tau^{(t)}, \tilde{\boldsymbol{\beta}}^{(t)}) = \frac{1}{p} \mathbf{X}^T \frac{1}{T} \sum_{t=1}^T (\sigma_b^{(t)})^2 (\mathbf{H}^{(t)})^{-1} (\mathbf{y} - \mathbf{X}_{\gamma^{(t)}} \tilde{\boldsymbol{\beta}}_{\gamma^{(t)}}^{(t)}), \quad (61)$$

where  $T$  is the total number of MCMC iterations, and the superscript  $(t)$  denotes the  $t$ th MCMC sample. Notice that we only need to do the  $p$  dimensional matrix-vector multiplication once at the end.

When  $|\gamma|$  is large, the most time consuming part of our MCMC scheme for fitting BSLMM and BVSr is the calculation of  $\Omega$ . The per-iteration computation time of the above algorithm is comparable to that of BVSr [3] with linear complexity in the number of individuals but quadratic complexity in  $|\gamma|$ . In practice, to reduce the computation burden, we set a maximal value for  $|\gamma|$  (300 for simulations and the two human data sets, 600 for the mouse data set). Setting the maximal value to a larger number (600) in simulations improves results only subtly, even for scenarios where a large number of causal SNPs is present.

## References

1. Lippert C, Listgarten J, Liu Y, Kadie CM, Davidson RI, et al. (2011) FaST linear mixed models for genome-wide association studies. *Nat Methods* 8: 833-835.
2. Zhou X, Stephens M (2012) Genome-wide efficient mixed-model analysis for association studies. *Nat Genet* 44: 821-824.
3. Guan Y, Stephens M (2011) Bayesian variable selection regression for genome-wide association studies, and other large-scale problems. *Ann Appl Stat* 5: 1780-1815.
4. Guan Y, Krone SM (2007) Small-world MCMC and convergence to multi-modal distributions: From slow mixing to fast mixing. *Ann Appl Probab* 17: 284-304.
